# Supplementary material for: Iran’s Land Suitability for Agriculture
Source: PubMed Central journal article supplement (PMC5550500; doi:10.1038/s41598-017-08066-y), 2017-08-09
Supplement: 41598_2017_8066_MOESM1_ESM.pdf [file 41598_2017_8066_MOESM1_ESM.pdf]

## Supplementary Information

### Iran's Land Suitability for Agriculture

Mohsen B. Mesgaran<sup>1</sup>, Kaveh Madani<sup>2</sup>, Hossein Hashemi<sup>3</sup>, and Pooya Azadi<sup>1\*</sup>

<sup>1</sup> Stanford Iran 2040 Project, Hamid and Christina Program in Iranian Studies, Stanford University, CA 94305, USA

<sup>2</sup> Centre for Environmental Policy, Imperial College London, London SW7 2AZ, UK

<sup>3</sup> School of Earth, Energy, and Environmental Sciences, Geophysics Department, Stanford University, CA 94305, USA

\*Corresponding author: Pooya Azadi

E-mail: pazadi@stanford.edu

## Supplementary Information

### Introduction

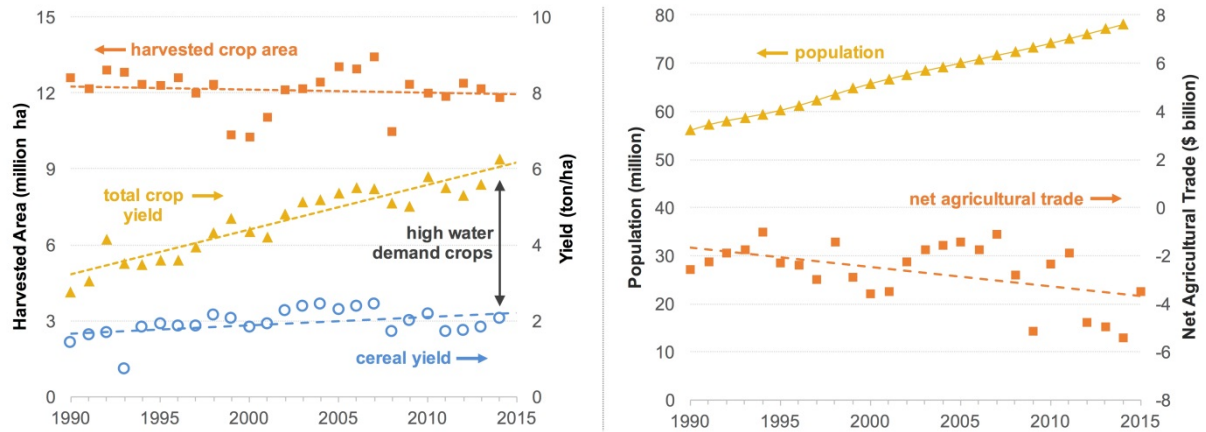

**Supplementary Figure S1.** Time variation of Iran's harvested area and yield for field crops (left, data from ref.1-3), and the population and net value of international trade of the agricultural products (right, data from ref. 4).

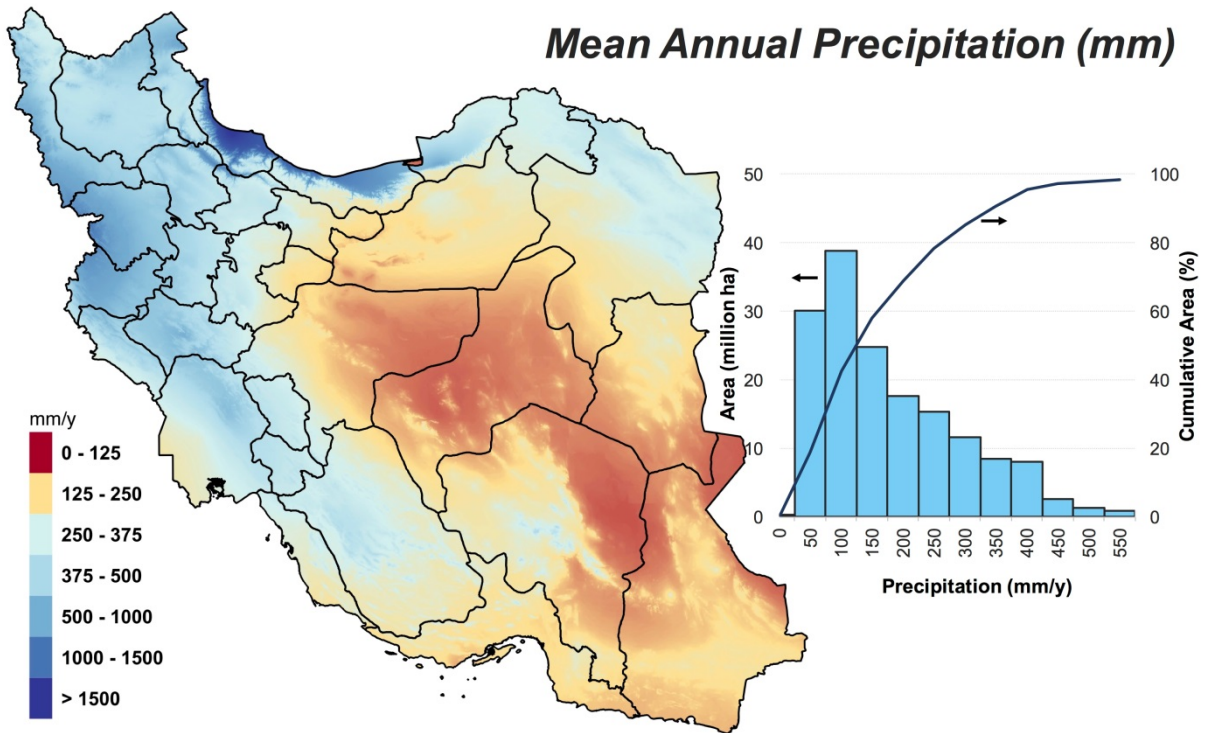

**Supplementary Figure S2.** Distribution of mean annual precipitation in Iran (long-term average of 1960-1990). Geospatial data obtained from ref. 5. Map was generated using QGIS 2.18.

## Supplementary Information

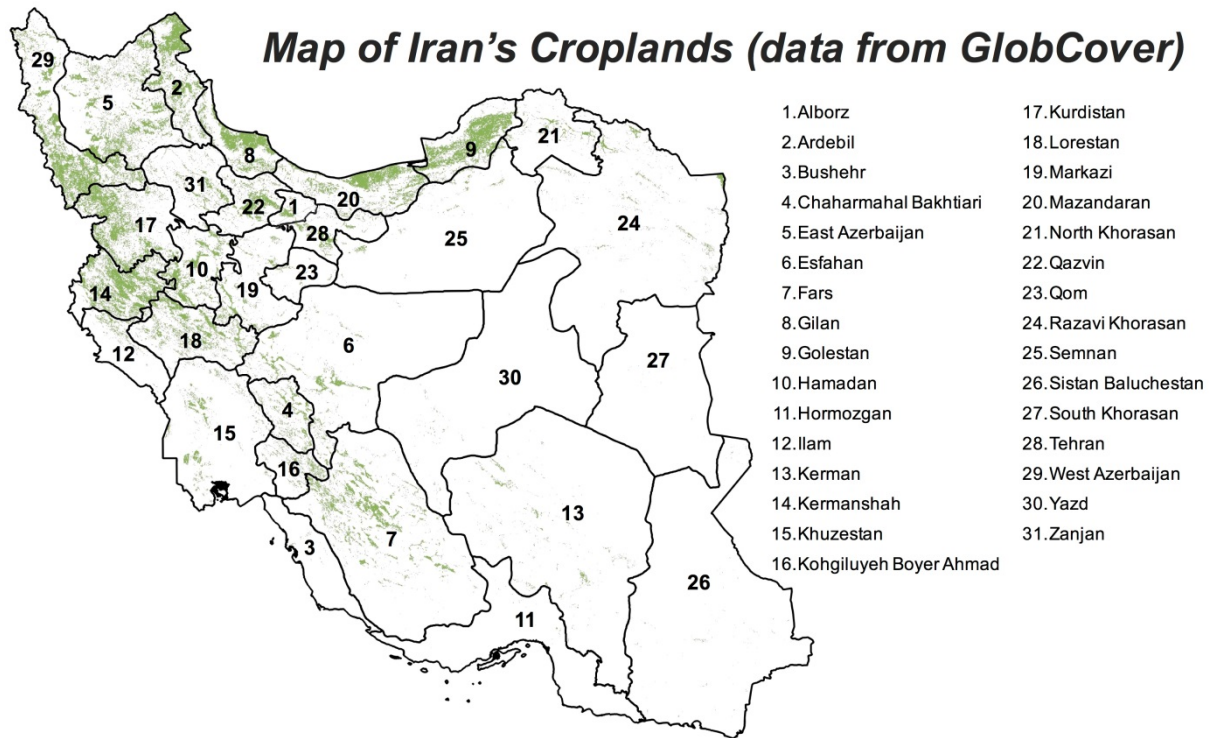

**Supplementary Figure S3.** Map of Iran's croplands based on data from GlobCover 2009<sup>6</sup>. Also shown is the name of provinces. Map was generated using QGIS 2.18.

## Supplementary Information

### Results

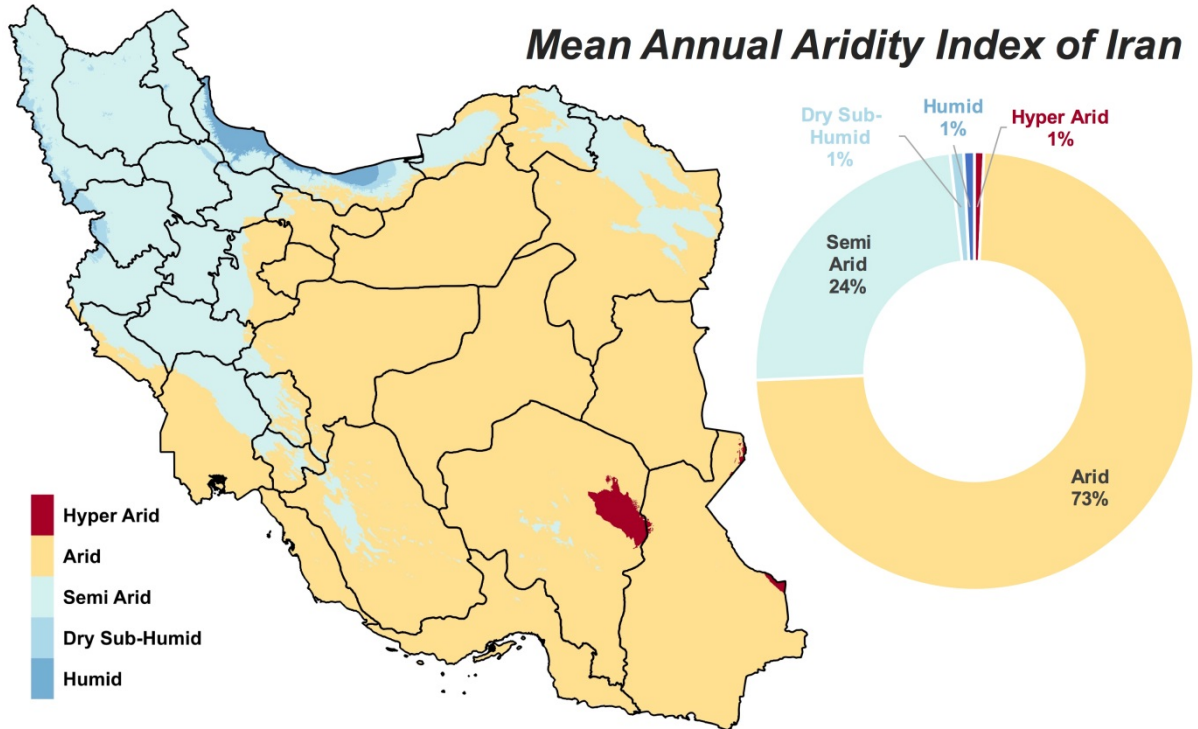

**Supplementary Figure S4.** The long-term (1960-1990) mean annual aridity index of Iran based on data from ref. 7 and classified according to ref. 8. Map was generated using QGIS 2.18.

## Supplementary Information

### Maps of Monthly Aridity in Iran

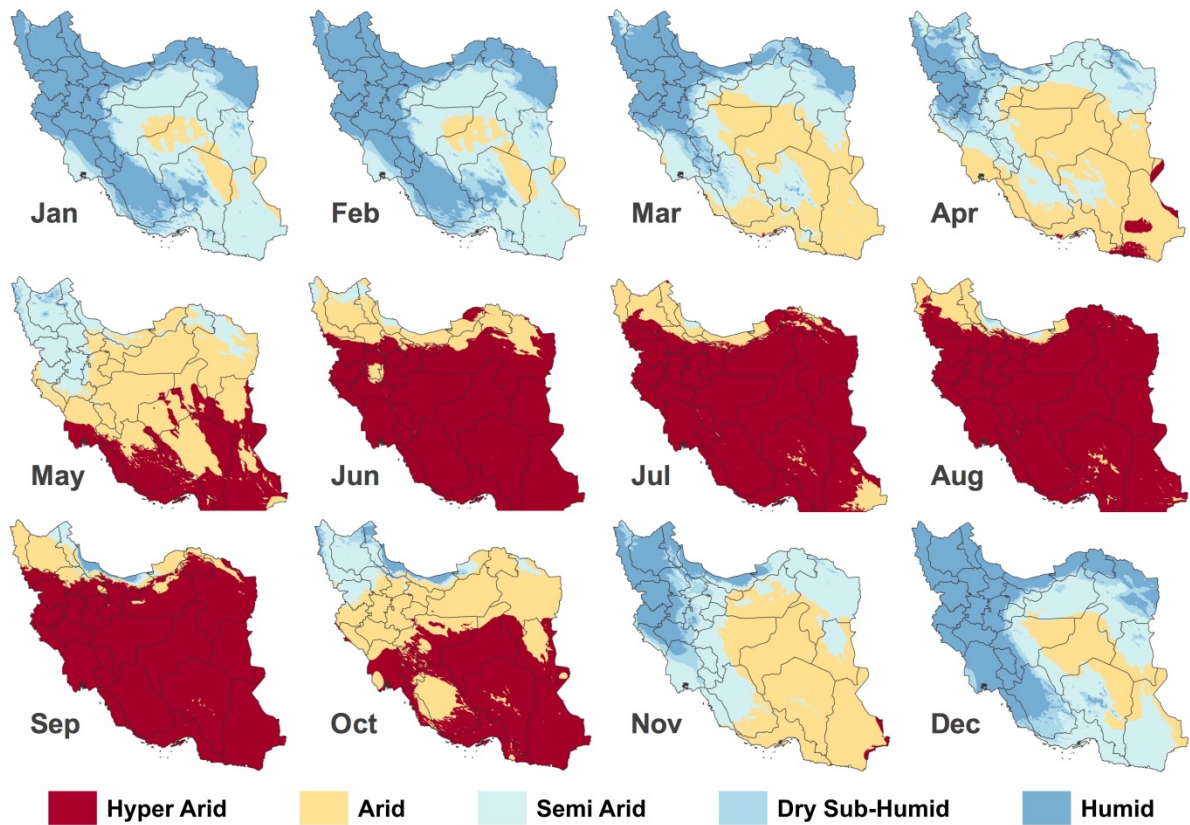

**Supplementary Figure S5.** Temporal and geographical distributions of aridity classes in Iran. Aridity index was calculated based on long-term (1960-1990) monthly precipitation and PET data (see Table 4 for source of data). Maps were generated using QGIS 2.18.

## Supplementary Information

### Crop Minimum and Optimum Water Requirement

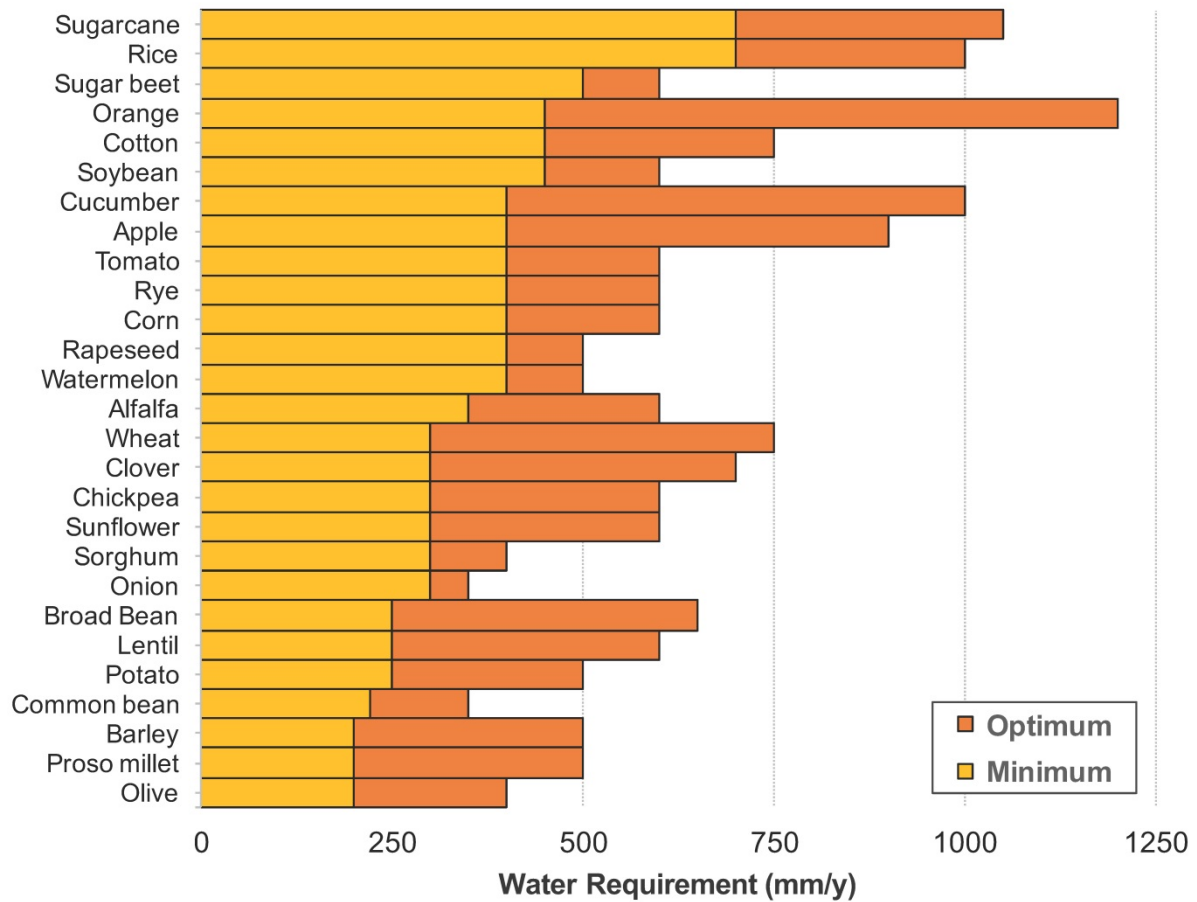

**Supplementary Figure S6.** Minimum and optimum water requirements of selected crops and orchards based on data from refs. 9 and 10.

### Methods

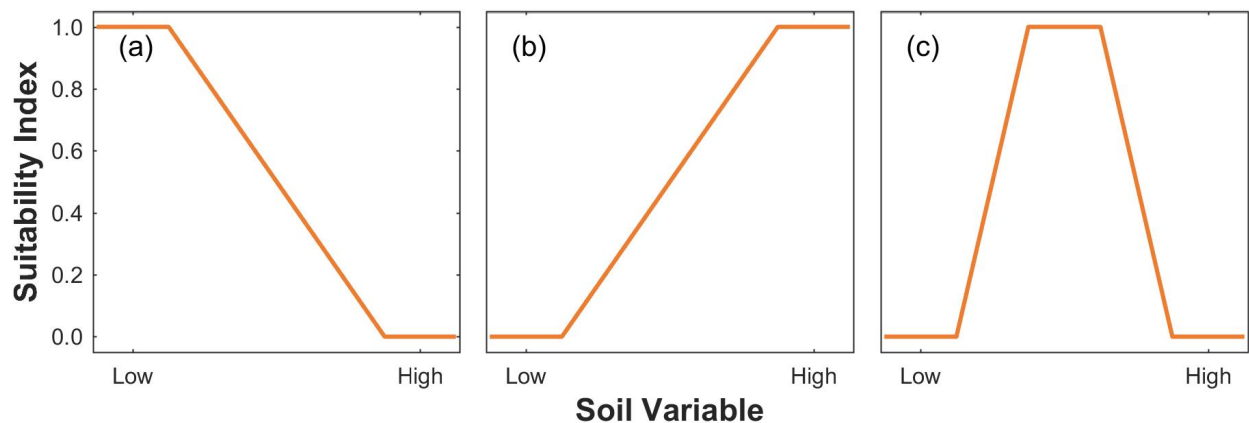

**Supplementary Figure S7.** Three response shapes used for relating soil and topographic properties to suitability index: (a) Z shape (equation. 1 in Methods), (b) mirrored-Z shape (equation. 2 in Methods) and (c) dent shape (equation. 3 in Methods).



## Supplementary Information

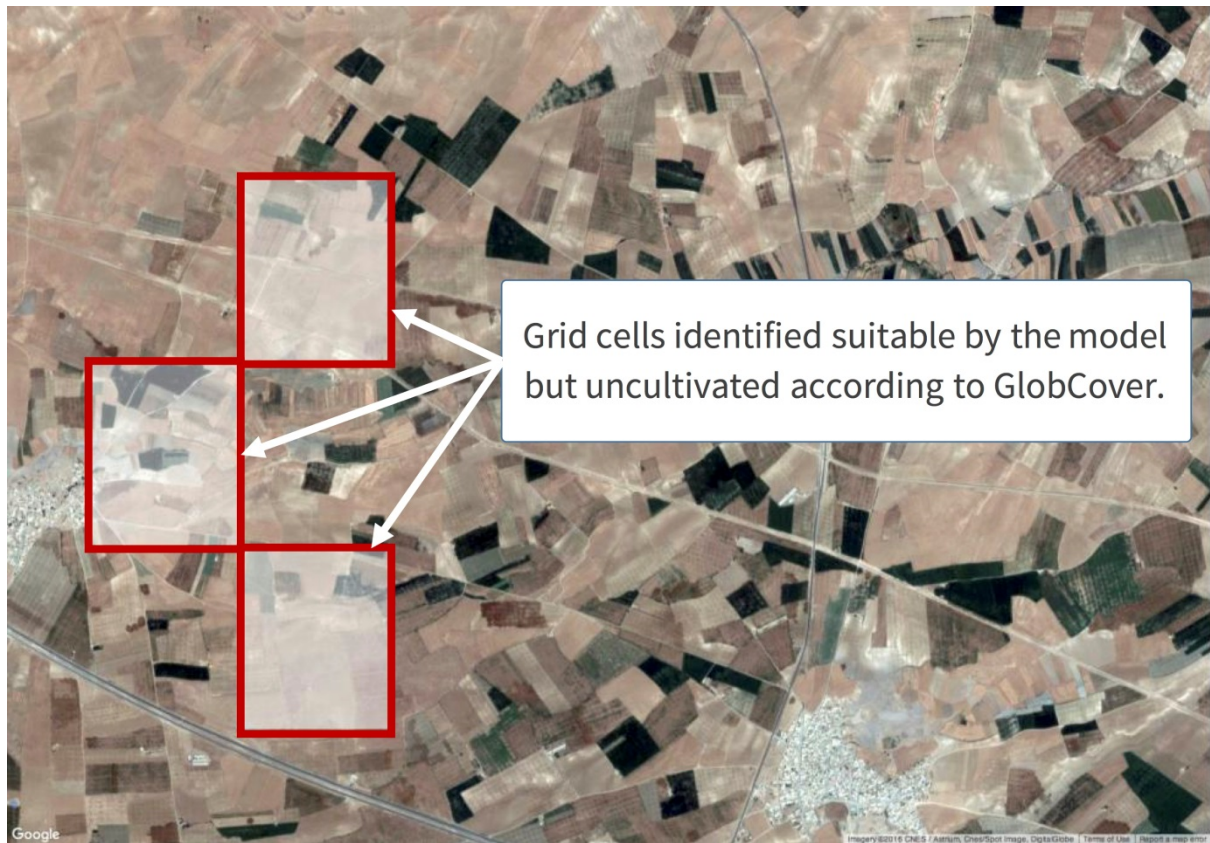

**Supplementary Figure S8.** Example of missing agricultural areas in GlobCover land-use databases<sup>6</sup>. Our suitability analysis characterized the selected grid cells as highly suitable for cropping and Google Earth images shows that these areas are under cultivation. However, in the GloBCover<sup>6</sup> land-use data these grid cells were identified as non-cropping areas. We identified many more cases of such mismatches between the GlobCover<sup>6</sup> and satellite images.

## Supplementary Information

**Supplementary Table S1.** Excluded lands from the suitability analysis.

| Land cover                    | Area (million ha) | % of country area |
|-------------------------------|-------------------|-------------------|
| Inland water                  | 1.1               | 0.7               |
| Protected areas               | 11.4              | 7.1               |
| Urbanized areas               | 0.5               | 0.3               |
| Natural Forest and Rangelands | 7.6               | 4.7               |
| <b>Total</b>                  | <b>19.3*</b>      | <b>11.9</b>       |

\* Note that because of the geographical overlap between some land cover types, the total excluded area is slightly smaller than the mathematical summation of the individual excluded areas.

**Supplementary Table S2.** Shape of response functions and threshold values used for transforming variables to suitability index (*SI*).

| Variable                                              | Response shape                 | $V_{min}$ | $V_{oL}$ | $V_{oU}$ | $V_{max}$ |
|-------------------------------------------------------|--------------------------------|-----------|----------|----------|-----------|
| pH (H <sub>2</sub> O)                                 | Dent shape (equation. 3)       | 4.5       | 6.5      | 7.1      | 8.5       |
| Cation Exchange Capacity, CEC (cmol <sub>c</sub> /kg) | Mirrored-Z shape (equation. 2) | 4         | 16       | -        | -         |
| Organic carbon, OC (%)                                | Mirrored-Z shape (equation. 2) | 0.2       | 1.8      | -        | -         |
| Coarse fragments (%)                                  | Z shape (equation. 1)          | -         | -        | 10       | 55        |
| Calcium carbonate, CaCO <sub>3</sub> (%)              | Z shape (equation. 1)          | -         | -        | 5        | 50        |
| Gypsum (%)                                            | Z shape (equation. 1)          | -         | -        | 2        | 25        |
| Base saturation, BS (%)                               | Mirrored-Z shape (equation. 2) | 20        | 50       | -        | -         |
| Electrical conductivity, EC (dS/m)                    | Z shape (equation. 1)          | -         | -        | 2        | 20        |
| Exchangeable Sodium Percentage, ESP (%)               | Z shape (equation. 1)          | -         | -        | 4        | 45        |
| Available Water Content, AWC (mm/m)                   | Mirrored-Z shape (equation. 2) | 35        | 100      | -        | -         |
| Slope (%)                                             | Z shape (equation. 1)          | -         | -        | 5        | 30        |
| Precipitation (mm)                                    | Mirrored-Z shape (equation. 2) | 100       | 500      | -        | -         |

The threshold parameters were derived from ref. 9-13.



## Supplementary Information

**Supplementary Table S3.** Suitability index of soil textures for cropping as related to nutrient availability, rooting conditions, and workability according to FAO's recommendation<sup>13</sup>.

| Texture         | Nutrient availability | Rooting conditions | Workability |
|-----------------|-----------------------|--------------------|-------------|
| Clay (heavy)    | 1.00                  | 0.91               | 0.82        |
| Silty clay      | 1.00                  | 1.00               | 1.00        |
| Silty clay loam | 1.00                  | 1.00               | 1.00        |
| Clay loam       | 1.00                  | 1.00               | 1.00        |
| Silt            | 1.00                  | 1.00               | 1.00        |
| Silt loam       | 1.00                  | 1.00               | 1.00        |
| Sandy clay      | 1.00                  | 1.00               | 1.00        |
| Loam            | 1.00                  | 1.00               | 1.00        |
| Sandy clay loam | 1.00                  | 0.99               | 1.00        |
| Sandy loam      | 0.90                  | 0.99               | 1.00        |
| Loamy sand      | 0.69                  | 0.99               | 1.00        |
| Sand            | 0.35                  | 0.98               | 1.00        |

### References

1. An Statistical Overview of Field Crops Harvested Area and Production in the Past 36 Years, Iranian Ministry of Agriculture (In Farsi) (2015).
2. Agriculture Statistics: Volume 1, Field Crops, Iranian Ministry of Agriculture (In Farsi). (2013 – 2014).
3. Agriculture Statistics: Volume 2, Horticultural Crops, Iranian Ministry of Agriculture (In Farsi). (2013).
4. The World Bank Data, [www.data.worldbank.org](http://www.data.worldbank.org). (2016).
5. R.J. Hijmans, S.E. Cameron, J.L. Parra, P.G. Jones, A. Jarvis, Very high resolution interpolated climate surfaces for global land areas. *Int. J. Clim.* **25**, 1965-1978, (2005).
6. Bontemps, S., Defourny, P., Bogaert, E., Arino, O., Kalogirou, V. GLOBCOVER, Products Description and Validation Report. ESA, University catholique de Louvain, (2009).
7. Land Processes Distributed Active Archive Center (LP DAAC), located at USGS/EROS, Sioux Falls, SD. <http://lpdaac.usgs.gov>. (2016).
8. United Nations Educational, Scientific and Cultural Organization (UNESCO), Map of the world distribution of arid regions: Map at scale 1:25,000,000 with explanatory note. MAB Technical Notes 7, UNESCO, Paris, (1979).

## Supplementary Information

9. Food and Agriculture Organization of the United Nations, EcoCrop Database, FAO, Rome, Italy, [www.ecocrop.fao.org](http://www.ecocrop.fao.org) (2013).
10. Expert cross checking and validation of crop niche predictions, [gisweb.ciat.cgiar.org/ClimateChange/EcoCropFB/](http://gisweb.ciat.cgiar.org/ClimateChange/EcoCropFB/), CGIAR, (2016).
11. Abrol, I.P., Yadav, J.S.P. & Massoud, F.I. Salt-affected soils and their management. U.N. Food and Agric. Organ. Soils Bull. Rome, **39**, 131, (1988).
12. Sys, C., van Ranst, E., Debaveye, J. & Beernaert F. Land evaluation. Part III: Crop requirements. Agric. Publ. 7. Administration for Dev. Coop., Brussels, Belgium, (1993).
13. Fischer, G., et al., Global Agro-ecological Zones (GAEZ v3. 0)-Model Documentation. Laxenburg, Austria: International Institute for Applied Systems Analysis, (2012).
